# Supplementary material
Source: PubMed Central journal article supplement (PMC11513182)
Supplement: NIHMS2028924-supplement-Supplementary_Fig.pdf [file NIHMS2028924-supplement-Supplementary_Fig.pdf]

## Supplementary Material

### 1 $\lambda$ Parameter Analysis

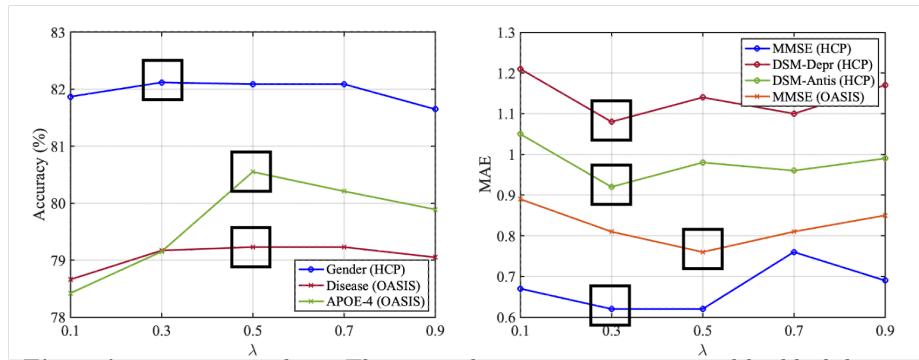

**Fig. 1.**  $\lambda$  parameter analysis. The optimal points are encompassed by black boxes.
